# Supplementary material for: Geometry of the Gene Expression Space of Individual Cells
Source: PubMed Central journal article supplement (PMC4498931; doi:10.1371/journal.pcbi.1004224), 2015-07-10

Number of archetypes

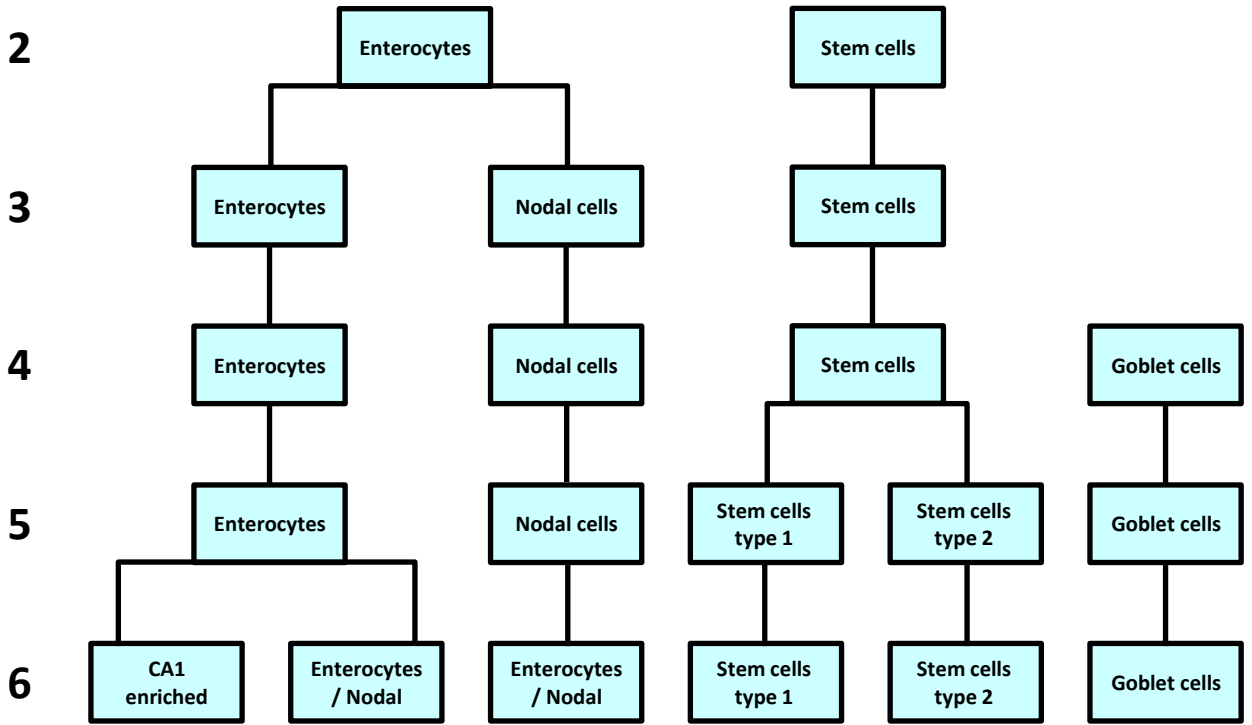

Supplement: pcbi.1004224.s020.pdf [file pcbi.1004224.s020.pdf]
