# Supplementary material for: Geometry of the Gene Expression Space of Individual Cells
Source: PLoS Comput Biol. 2015 Jul 10;11(7):e1004224. doi: 10.1371/journal.pcbi.1004224 (PMC4498931; doi:10.1371/journal.pcbi.1004224)
Supplement: S7 Table — Leave-1-out enrichment results (Methods: 1D enrichment at archetypes, bin size = 0.1, demanding p-value lower than 0.001 using Rank-sum test) when looking for k = 2–6 archetypes for intestinal cells data. Archetypes titles in S20 Fig were given based on these results. (XLSX) [file pcbi.1004224.s031.xlsx]

## Sheet: 2
2 archetypes
1	2
CD177	DLL4
MS4A12	FSCN1
CEACAM1	EPCAM
CA1	CDH1
	CLDN7
	AGR2
	GAPDH
	NAMPT
	ECT2
	STMN1
	VEGFA
	AQP1
	NOTCH1
	HES1
	LEFTY1
	UGT2B17
	CDCA7
	RGMB
	PTPRO
	RNF43
	KIF12
	METTL3
	AXIN2
	CDK6
	OLFM4
	MYC
	CFTR
	TSPAN6
	UGT8
	SEC62
	SLC12A2
	FERMT1
	DPP4
	PTPLAD1
	LRIG1
	EGFR
	BMI1
	DNMT3A
	ASCL2
	TERT

## Sheet: 3
3 archetypes
1	2	3
AQP8	CFC1	DLL4
SLC26A3	UGT1A1	FSCN1
MS4A12	CLDN8	EPCAM
CEACAM1	NODAL	CDH1
KRT20	TDGF1	CLDN7
	PCGF6	GAPDH
		NAMPT
		ECT2
		STMN1
		VEGFA
		AQP1
		NOTCH1
		HES1
		LEFTY1
		CDCA7
		RGMB
		PTPRO
		RNF43
		KIF12
		METTL3
		AXIN2
		OLFM4
		MYC
		CFTR
		SEC62
		SLC12A2
		USP16
		FERMT1
		DPP4
		PTPLAD1
		LRIG1
		EGFR
		BMI1
		DNMT3A
		ASCL2
		LGR5
		TERT
		CA2

## Sheet: 4
4 archetypes
1	2	3	4
AQP8	CFC1	DLL4	DLL4
CD177	UGT1A1	FSCN1	FSCN1
SLC26A3	CLDN8	EPCAM	CDKN1A
MS4A12	NODAL	CDH1	CLDN1
CEACAM1	TDGF1	CLDN7	DLL1
KRT20	PCGF6	AGR2	MUC2
		GAPDH	SPINK4
		NAMPT	TFF3
		ECT2	SPDEF
		STMN1	EPCAM
		EZH2	CDH1
		AQP1	AGR2
		NOTCH1	TCF7L2
		HES1	MLLT10
		LEFTY1	SLC12A2
		UGT2B17	USP16
		CDCA7	TERT
		RGMB
		PTPRO
		RNF43
		KIF12
		METTL3
		AXIN2
		OLFM4
		MYC
		CFTR
		TSPAN6
		UGT8
		SEC62
		SLC12A2
		USP16
		FERMT1
		DPP4
		PTPLAD1
		LRIG1
		EGFR
		BMI1
		DNMT3A
		ASCL2
		LGR5
		TERT

## Sheet: 5
5 archetypes
1	2	3	4	5
AQP8	CFC1	FSCN1	FSCN1	CDKN1A
CD177	UGT1A1	EPCAM	ACTB	PHLDA1
MS4A12	CLDN8	CDH1	EPCAM	DLL1
CEACAM1	NODAL	AGR2	CDH1	SPINK4
KRT20	TDGF1	GAPDH	CLDN7	AGR2
	PCGF6	NAMPT	AGR2	SLC12A2
	NOTCH2	ECT2	GAPDH	TERT
		EZH2	NAMPT
		AQP1	ANLN
		NOTCH1	MET
		LEFTY1	AQP1
		UGT2B17	NOTCH1
		RNF43	LEFTY1
		KIF12	UGT2B17
		METTL3	RNF43
		AXIN2	METTL3
		CDK6	AXIN2
		OLFM4	TSPAN6
		MYC	SEC62
		TSPAN6	FERMT1
		SEC62	DPP4
		SLC12A2	LRIG1
		FERMT1	EGFR
		DPP4	DNMT3A
		PTPLAD1	CA2
		LRIG1
		EGFR
		BMI1
		GPSM2
		TERT

## Sheet: 6
6 archetypes
1	2	3	4	5	6
CA1	NODAL	UGT1A1	DLL4	DLL4	DLL4
	ASCL2	PCGF6	TFF3	FSCN1	FSCN1
	AQP8	NOTCH2	EPCAM	SPDEF	CDKN1A
	MS4A12	CD177	CDH1	ACTB	PHLDA1
	KRT20	SLC26A3	AGR2	EPCAM	CLDN1
	CA1	GUCA2B	GAPDH	CDH1	DLL1
			MLLT10	CLDN7	MUC2
			ECT2	AGR2	SPINK4
			STMN1	GAPDH	TFF3
			AQP1	NAMPT	SPDEF
			NOTCH1	TCF7L2	ACTB
			HES1	CXCL2	EPCAM
			LEFTY1	MLLT10	CDH1
			UGT2B17	ANLN	AGR2
			CDCA7	EZH2	TCF7L2
			RGMB	MET	MLLT10
			PTPRO	AQP1	ECT2
			RNF43	NOTCH1	AXIN2
			KIF12	HES1	SLC12A2
			METTL3	LEFTY1	USP16
			AXIN2	UGT2B17	FERMT1
			CDK6	RNF43	BMI1
			OLFM4	KIF12	GPSM2
			MYC	METTL3	TERT
			CFTR	AXIN2
			TSPAN6	CDK6
			UGT8	CFTR
			SEC62	TSPAN6
			SLC12A2	SEC62
			FERMT1	SLC12A2
			DPP4	FERMT1
			PTPLAD1	DPP4
			LRIG1	PTPLAD1
			EGFR	LRIG1
			BMI1	EGFR
			GPSM2	DNMT3A
			DNMT3A	CA2
			NOTCH2
			LGR5
			TERT
